# Supplementary material for: Heat-Killed L. helveticus Enhances Positive Mood States: A Randomized, Double-Blind, Placebo-Controlled Study
Source: MDPI journal article supplement (doi:10.3390/brainsci13060973), 2023-06-20
Supplement: s1 [file s1]

## Supplementary Materials

**Table S1.** Data for each question item in the positive mood indicator.<sup>1,2</sup>

| PANAS 'Positive affect' | Before intervention |               | During intervention |               |
|-------------------------|---------------------|---------------|---------------------|---------------|
|                         | Placebo             | L. helveticus | Placebo             | L. helveticus |
| Active                  | 3.5 ± 1.1           | 3.7 ± 1.1     | 3.2 ± 0.8           | 3.9 ± 1.0*    |
| Proud                   | 2.3 ± 0.9           | 3.1 ± 1.1*    | 2.5 ± 0.8           | 3.2 ± 1.2     |
| Strong                  | 2.9 ± 1.1           | 3.0 ± 1.3     | 2.6 ± 0.8           | 3.0 ± 1.2     |
| Determined              | 3.2 ± 1.1           | 3.2 ± 1.2     | 2.9 ± 0.9           | 3.2 ± 1.2     |
| Inspired                | 2.8 ± 1.2           | 3.1 ± 1.2     | 2.9 ± 0.8           | 3.5 ± 1.2     |
| Excited                 | 3.4 ± 1.4           | 4.1 ± 1.1     | 3.0 ± 1.1           | 4.0 ± 1.1*    |
| Alert                   | 2.8 ± 0.9           | 2.9 ± 1.2     | 2.8 ± 0.6           | 3.0 ± 0.9     |
| Enthusiastic            | 2.2 ± 1.0           | 2.4 ± 1.0     | 2.4 ± 1.1           | 2.6 ± 0.9     |

<sup>1</sup> Values are means ± standard deviation of the mean.

<sup>2</sup> Scores of each group before and during intervention were compared by Student's t-test.

\* P < 0.05 between the two groups.

**Table S2.** Correlation analysis of the 'Friendliness' score with lifestyle responses.<sup>1,2</sup>

|                        | Pearson's coefficient of correlation | <i>p</i> value |
|------------------------|--------------------------------------|----------------|
| Age                    | 0.114                                | 0.268          |
| Sex                    | -0.067                               | 0.515          |
| One-person households  | -0.086                               | 0.404          |
| Having part-time jobs  | 0.225                                | 0.027          |
| Habitual yogurt intake | 0.065                                | 0.526          |

<sup>1</sup> Baseline scores from the current and previous studies [17] were used.

<sup>2</sup> Pearson's correlation analysis was performed. Smoking was excluded from the analysis because it was not suitable for inclusion due to the small number (total of 3 cases) of occurrences.

**Table S3.** Comparison of percentages of subjects with part-time jobs.<sup>1</sup>

|                              | Current study | Previous study [17] | <i>p</i> value |
|------------------------------|---------------|---------------------|----------------|
| Having part-time jobs (n, %) | 21 (53.8 %)   | 19 (32.8 %)         | 0.039          |

<sup>1</sup> Chi-square test performed.

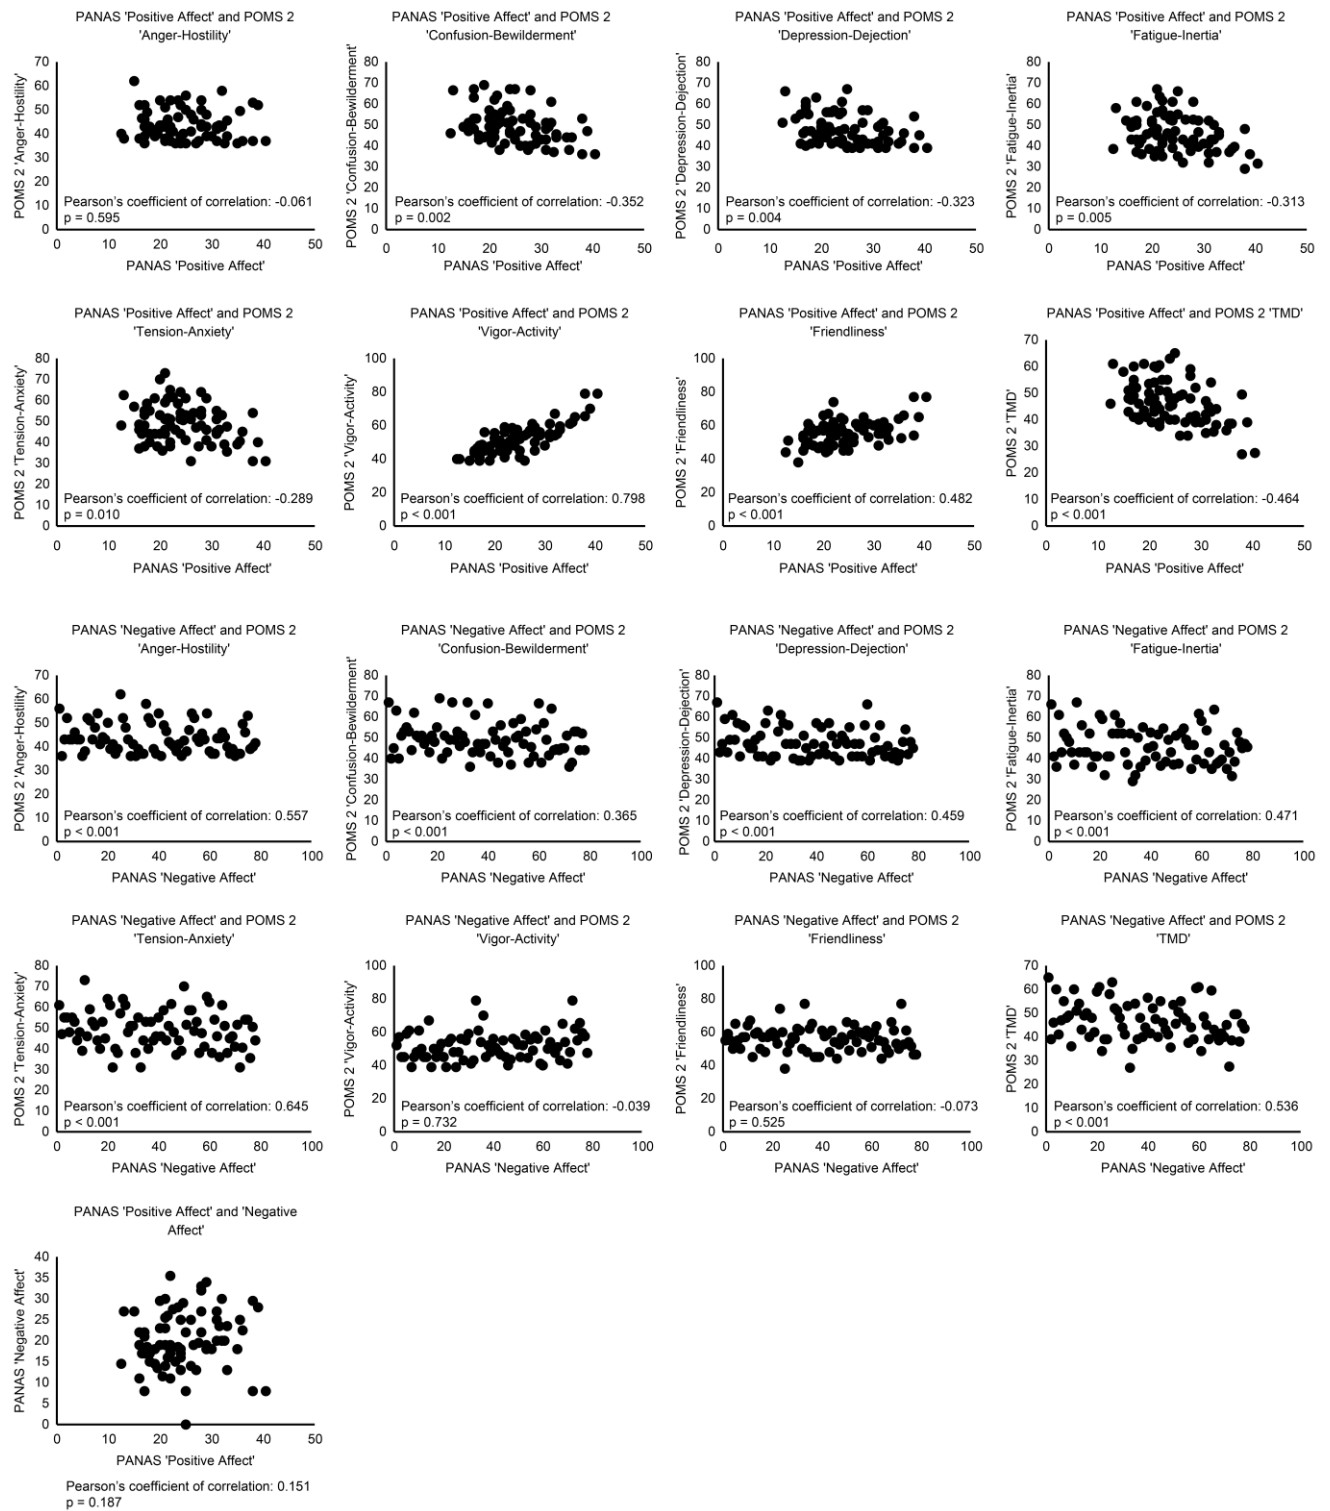

**Figure S1.** Correlation between PANAS and POMS2 items.  
 Pearson's correlation coefficients and significance probabilities were calculated for each of the PANAS and POMS 2 items.
